# Supplementary material
Source: Springer Nature journal article supplement (https://www.springermedizin.de/resource/supplementary/12888_2009_700_MOESM1_ESM.pdf/9478198)
Supplement: MOESM1 [file 9478198]

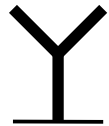

a)

incubation 1 h at 37 °C  
wash 3times

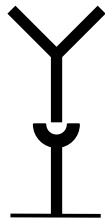

b)

incubation 1 h at 37 °C  
wash

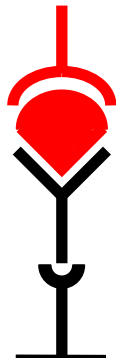

c)

incubation 1 h at 37 °C  
wash

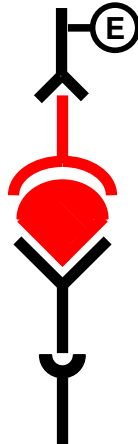

d)

incubation 1 h at 37 °C  
wash

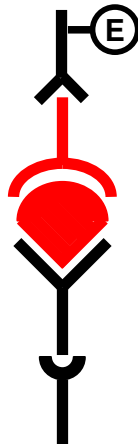

e)

**pNPP**  
incubation 5 min  
at laboratory temp.  
**pNP** + P
